# Supplementary material for: Transcriptomic Dysregulation of Inflammation-Related Genes in Leukocytes of Patients with Gestational Diabetes Mellitus (GDM) during and after Pregnancy: Identifying Potential Biomarkers Relevant to Glycemic Abnormality
Source: MDPI journal article supplement (doi:10.3390/ijms232314677), 2022-11-24
Supplement: s1 [file s1]

**Table S1.** PCR primer list

| GenBank        | Gene         | Description                                                              |     | Sequence 5'→3'            | Product length [bp] |
|----------------|--------------|--------------------------------------------------------------------------|-----|---------------------------|---------------------|
| NM_000600.5    | <i>IL6</i>   | Interleukin 6 (interferon, beta 2)                                       | OF: | CATCCTCGACGGCATCTCAG      | 163                 |
| NM_001371096.1 |              |                                                                          | OR: | CACCAGGCAAGTCTCCTCATT     |                     |
|                |              |                                                                          | IF: | CCTGAGAAAGGAGACATGTAACAAG | 79                  |
|                |              |                                                                          | IR: | AAGGTTTCAGGTTGTTTTCTGCC   |                     |
| NM_000584.4    | <i>CXCL8</i> | Interleukin 8 (IL8, C-X-C motif chemokine ligand 8, CXCL8)               | OF: | TTTTGCCAAGGAGTGCTAAAGA    | 194                 |
| NM_001354840.3 |              |                                                                          | OR: | AACCCTCTGCACCCAGTTTTC     |                     |
|                |              |                                                                          | IF: | ACTGAGAGTGATTGAGAGTGGAC   | 112                 |
|                |              |                                                                          | IR: | AACCCTCTGCACCCAGTTTTC     |                     |
| NM_000572.3    | <i>IL10</i>  | Interleukin 10 (cytokine synthesis inhibitory factor, IL10A,TGIF,GVHDS,) | OF: | CGAGATGCCTTCAGCAGAGT      | 257                 |
|                |              |                                                                          | OR: | AGAAATCGATGACAGCGCC       |                     |
|                |              |                                                                          | IF: | CTTTAAGGGTTACCTGGGTTGC    | 103                 |
|                |              |                                                                          | IR: | CGCCTTGATGTCTGGGTCTT      |                     |
| NM_001354991.2 | <i>IL13</i>  | Interleukin 13                                                           | OF: | CTGGAATCCCTGATCAACGTGT    | 322                 |
| NM_001354992.2 |              |                                                                          | OR: | TTTACCCCTCCCTAACCCCTCC    |                     |
| NM_001354993.2 |              |                                                                          | IF: | AAGGTCTCAGCTGGGCAGTTTT    | 115                 |
| NM_002188.3    |              |                                                                          | IR: | ACTGTCCCTCGCGAAAAAGTT     |                     |
| NM_001243211.2 | <i>IL18</i>  | Interleukin 18 (interferon-gamma-inducing factor)                        | OF: | AAGATGGCTGCTGAACCAGT      | 245                 |
| NM_001386420.1 |              |                                                                          | OR: | GTCCGGGGTGCAATTATCTCT     |                     |
| NM_001562.4    |              |                                                                          | IF: | GCTGAAGATGATGAAAACCTGGA   | 115                 |
|                |              |                                                                          | IR: | GAGGCCGATTTCTTGGTCA       |                     |
| NM_001145138.2 | <i>RELA</i>  | Polypeptide gene enhancer in B-cells 3, p65                              | OF: | CTCCTGTGCGTGCTCCAT        | 214                 |
| NM_001243984.2 |              |                                                                          | OR: | GAAGGCACAGCAATGCGTC       |                     |
| NM_001243985.2 |              |                                                                          | IF: | GCCAGATACAGACGATCGTCA     | 138                 |
| NM_021975.4    |              |                                                                          | IR: | GAAGGCACAGCAATGCGTC       |                     |
| NM_000594.4    | <i>TNFA</i>  | Tumor necrosis factor (TNF superfamily, member 2)                        | OF: | GAGGCGCTCCCAAGAAGAC       | 416                 |
|                |              |                                                                          | OR: | GTGAGGAGCACATGGGTGGA      |                     |
|                |              |                                                                          | IF: | GCCTCTTCTCCTTCCTGATCG     | 143                 |
|                |              |                                                                          | IR: | AGAAGATGATCTGACTGCCTGG    |                     |
| NM_001101.5    | <i>ACTB</i>  | Actin beta                                                               | OF: | GCCGAGACCGCGTCC           | 186                 |
|                |              |                                                                          | OR: | CACGATGGAGGGGAAGACG       |                     |
|                |              |                                                                          | IF: | GCACAGAGCCTCGCCTT         | 93                  |
|                |              |                                                                          | IR: | GTTGTCGACGACGAGCG         |                     |

Abbreviations: bp, base pairs; IF, inner forward; IR, inner reverse; OF, outer forward; OR, outer reverse

**Table S2.** Logistic regression models for predicting postpartum AGT in GDM patients (postpartum NGT, n=18; postpartum AGT, n=10)

| Model no | Factors                     | Global<br>significance<br><i>p-value</i> |                | Hosmer<br>Lemeshow's<br>test <i>p-value</i> | Goodness of fit |              |              |                   |                   | Validation  |              |             |             |
|----------|-----------------------------|------------------------------------------|----------------|---------------------------------------------|-----------------|--------------|--------------|-------------------|-------------------|-------------|--------------|-------------|-------------|
|          |                             | LR<br>test                               | Wald's<br>test |                                             | AIC             | AICC         | BIC          | Cox-Snell's<br>R2 | Nagelkerk's<br>R2 | AUC         | AUC<br>Error | AUC         | AUC Error   |
| 1        | <i>IL8</i>                  | <b>0.0195</b>                            | <b>0.0370</b>  | 0.4628                                      | 35.04           | 35.52        | 37.71        | 0.18              | 0.24              | 0.75        | 0.11         | 0.65        | 0.12        |
| 2        | <i>IL13</i>                 | <b>0.0356</b>                            | 0.0542         | 0.1696                                      | 36.08           | 36.56        | 38.75        | 0.15              | 0.20              | 0.73        | 0.10         | 0.52        | 0.12        |
| 3        | <i>TNFA</i>                 | <b>0.0097</b>                            | <b>0.0273</b>  | 0.2820                                      | 33.80           | 34.28        | 36.47        | 0.21              | 0.29              | 0.76        | 0.10         | 0.66        | 0.13        |
| 4        | <i>FPG</i>                  | 0.2161                                   | 0.2287         | 0.6225                                      | 38.97           | 39.45        | 41.63        | 0.05              | 0.07              | 0.71        | 0.10         | 0.54        | 0.13        |
| 5        | <i>IL8+IL13+TNFA+FPG</i>    | <b>0.0030</b>                            | <b>0.1004</b>  | 0.6381                                      | 30.52           | 33.24        | 37.18        | 0.43              | <b>0.60</b>       | <b>0.91</b> | <b>0.06</b>  | <b>0.79</b> | <b>0.10</b> |
| 6        | <i>IL8+IL13+TNFA</i>        | <b>0.0013</b>                            | 0.0536         | 0.6665                                      | 28.75           | 30.49        | 34.08        | 0.43              | 0.59              | 0.91        | 0.06         | 0.78        | 0.10        |
| 7        | <i>IL8xTNFA+IL13</i>        | <b>0.0002</b>                            | <b>0.0336</b>  | 0.5174                                      | <b>25.19</b>    | <b>26.19</b> | <b>29.18</b> | <b>0.46</b>       | <b>0.63</b>       | <b>0.89</b> | <b>0.06</b>  | 0.68        | 0.13        |
| 8        | <i>IL8+IL13</i>             | <b>0.0030</b>                            | <b>0.0328</b>  | 0.4821                                      | 30.87           | 31.87        | 34.87        | 0.34              | 0.47              | <b>0.87</b> | <b>0.07</b>  | <b>0.77</b> | <b>0.09</b> |
| 9        | <i>[IL8xIL13xTNFAx FPG]</i> | <b>0.0001</b>                            | <b>0.0178</b>  | 0.3531                                      | <b>25.45</b>    | <b>25.93</b> | <b>28.11</b> | <b>0.42</b>       | <b>0.57</b>       | 0.85        | 0.08         | 0.76        | 0.12        |
| 10       | <i>[IL8xIL13xTNFA]</i>      | <b>0.0002</b>                            | <b>0.0140</b>  | 0.3925                                      | <b>26.56</b>    | <b>27.04</b> | <b>29.22</b> | <b>0.39</b>       | 0.54              | 0.85        | 0.08         | <b>0.80</b> | 0.11        |

The significant results of statistical tests and best scores of each goodness of fit measurement shown in bold.

Abbreviations: AIC, Akaike Information Criterion; AICC, Akaike Information Corrected Criterion; AUC, area under the curve BIC, Bayesian Information Criterion; LR test, Likelihood-Ratio test
